# Supplementary material
Source: Springer Nature journal article supplement (https://www.springermedizin.de/resource/supplementary/13075_2010_3131_MOESM6_ESM.pdf/9693754)

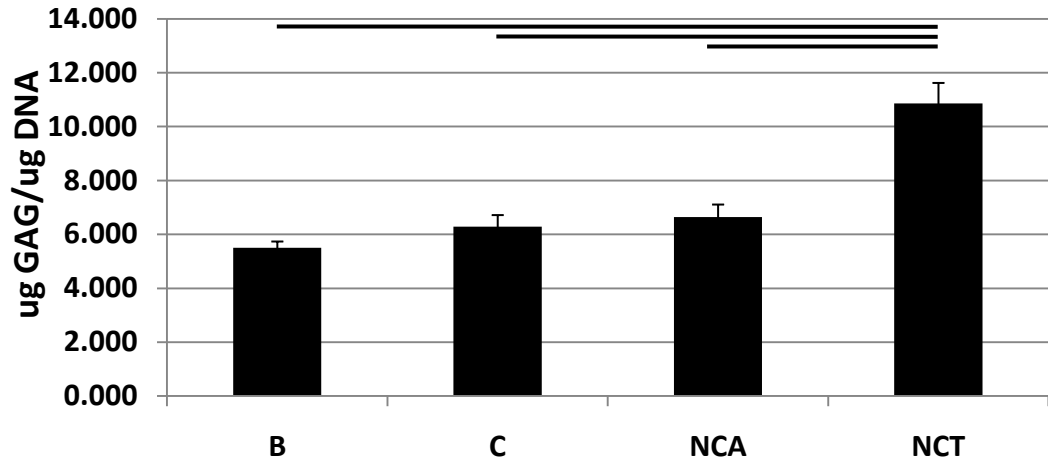

Supplement: MOESM6 [file 9693754]
